# Supplementary material for: Modular assembly of yeast cytochrome oxidase
Source: PubMed Central journal article supplement — Mol Biol Cell. 2013 Feb 15;24(4):440–52. doi: 10.1091/mbc.E12-10-0749 (PMC3571867; doi:10.1091/mbc.e12-10-0749), 2013-02-15
Supplement: supp_E12-10-0749v1_CombinedSupMats.pdf [file supp_E12-10-0749v1_CombinedSupMats.pdf]

## Supplementary material

Table S1. Genotypes and Sources of *Saccharomyces cerevisiae* Strains

| Strain                           | Genotype                                                                                            | mtDNA                                                    | Source                      |
|----------------------------------|-----------------------------------------------------------------------------------------------------|----------------------------------------------------------|-----------------------------|
| W303-1A                          | <b>MATa</b> <i>ade2-1 his3-1,15 leu2-3,112 trp1-1 ura3-1</i>                                        | $\rho^+$                                                 | A                           |
| W303-1A                          | <b>MAT<math>\alpha</math></b> <i>ade2-1 his3-1,15 leu2-3,112 trp1-1 ura3-1</i>                      | $\rho^+$                                                 | A                           |
| aW303I <sup>o</sup>              | <b>MATa</b> <i>ade2-1 his3-1,15 leu2-3,112 trp1-1 ura3-1</i>                                        | $\rho^+$ (intronless)                                    | Barros <i>et al.</i> , 2006 |
| MR6                              | <b>MATa</b> <i>ade2-1 his3-1,15 leu2-3,112 trp1-1 ura3-1 arg8::HIS3</i>                             | $\rho^+$ (S288C)                                         | Rak <i>et al.</i> 2007      |
| MRS-3A                           | <b>MATa</b> <i>ade2-1 his3-1,15 leu2-3,112 trp1-1 ura3-1 arg8::HIS3</i>                             | $\rho^+$ (S288C)                                         | This study                  |
| MRS-3B                           | <b>MAT<math>\alpha</math></b> <i>ade2-1 his3-1,15 leu2-3,112 trp1-1 ura3-1 arg8::HIS3</i>           | $\rho^+$ (S288C)                                         | This study                  |
| aMRSI <sup>o</sup>               | <b>MATa</b> <i>ade2-1 his3-1,15 leu2-3,112 trp1-1 ura3-1 arg8::HIS3</i>                             | $\rho^+$ (intronless)                                    | This study                  |
| MRSI <sup>o</sup>                | <b>MAT<math>\alpha</math></b> <i>ade2-1 his3-1,15 leu2-3,112 trp1-1 ura3-1 arg8::HIS3</i>           | $\rho^+$ (intronless)                                    | This study                  |
| DFK160                           | <b>MAT<math>\alpha</math></b> <i>kar1-1 ade2-10 arg8::URA3 leu2<math>\Delta</math> ura3-52</i>      | $\rho^o$                                                 | Steele <i>et al.</i> , 1996 |
| DFK $\rho^o$                     | <b>MAT<math>\alpha</math></b> <i>kar1-1 ade2-10 arg8::URA3 leu2<math>\Delta</math> ura3-52 lys2</i> | $\rho^o$                                                 | This study                  |
| DFK $\Delta$ COX1 $\rho^-$       | <b>MAT<math>\alpha</math></b> <i>kar1-1 ade2-10 arg8::URA3 leu2<math>\Delta</math> ura3-52 lys2</i> | $\rho^-$ (pCOX1/ST2)                                     | This study                  |
| DFK $\Delta$ COX1-HA $\rho^-$    | <b>MAT<math>\alpha</math></b> <i>kar1-1 ade2-10 arg8::URA3 leu2<math>\Delta</math> ura3-52 lys2</i> | $\rho^-$ (pCOX1/ST10)                                    | This study                  |
| DFK $\Delta$ COX1-HAH $\rho^-$   | <b>MAT<math>\alpha</math></b> <i>kar1-1 ade2-10 arg8::URA3 leu2<math>\Delta</math> ura3-52 lys2</i> | $\rho^-$ (pCOX1/ST11)                                    | This study                  |
| DFK $\Delta$ COX1-HAC $\rho^-$   | <b>MAT<math>\alpha</math></b> <i>kar1-1 ade2-10 arg8::URA3 leu2<math>\Delta</math> ura3-52 lys2</i> | $\rho^-$ (pCOX1/ST12)                                    | This study                  |
| MRSI <sup>o</sup> $\Delta$ COX1  | <b>MATa</b> <i>ade2-1 his3-1,15 leu2-3,112 trp1-1 ura3-1 arg8::HIS3</i>                             | $\rho^+$ (intronless, $\Delta$ cox1::ARG8 <sup>m</sup> ) | This study                  |
| aMRSI <sup>o</sup> $\Delta$ COX1 | <b>MATa</b> <i>ade2-1 his3-1,15 leu2-3,112 trp1-1 ura3-1 arg8::HIS3</i>                             | $\rho^+$ (intronless, $\Delta$ cox1::ARG8 <sup>m</sup> ) | This study                  |
| MRS/COX1-HAH                     | <b>MATa</b> <i>ade2-1 his3-1,15 leu2-3,112 trp1-1 ura3-1 arg8::HIS3</i>                             | $\rho^+$ COX1-HAH                                        | This study                  |

(Table I cont)

|                              |                                                                                                     |                                               |            |
|------------------------------|-----------------------------------------------------------------------------------------------------|-----------------------------------------------|------------|
| MRSI <sup>o</sup> /COX1-HA   | <b>MAT</b> <sub>a</sub> <i>ade2-1 his3-1,15 leu2-3,112 trp1-1 ura3-1 arg8::HIS3</i>                 | ρ <sup>+</sup> <i>COX1-HA</i>                 | This study |
| MRI <sup>o</sup> /COX1-HAH   | <b>MAT</b> <sub>a</sub> <i>ade2-1 his3-1,15 leu2-3,112 trp1-1 ura3-1 arg8::HIS3</i>                 | ρ <sup>+</sup> (intronless, <i>COX1-HAH</i> ) | This study |
| aMRSI <sup>o</sup> /COX1-HAC | <b>MAT</b> <sub>a</sub> <i>ade2-1 his3-1,15 leu2-3,112 trp1-1 ura3-1 arg8::HIS3</i>                 | ρ <sup>+</sup> (intronless, <i>COX1-HAC</i> ) | This study |
| aMRS/COX1-HAC                | <b>MAT</b> <sub>a</sub> <i>ade2-1 his3-1,15 leu2-3,112 trp1-1 ura3-1 arg8::HIS3</i>                 | ρ <sup>+</sup> ( <i>COX1-HAC</i> )            | This study |
| W303ΔCOX4-HAC                | <b>MAT</b> <sub>α</sub> <i>ade2-1 his3-1,15 leu2-3,112 trp1-1 ura3-1 cox4::URA3 leu2::COX4-HAC</i>  | ρ <sup>+</sup>                                | This study |
| W303ΔCOX5a-HAC               | <b>MAT</b> <sub>α</sub> <i>ade2-1 his3-1,15 leu2-3,112 trp1-1 ura3-1 cox5::HIS3 trp1::COX5-HAC</i>  | ρ <sup>+</sup>                                | This study |
| W303ΔCOX6-HAC                | <b>MAT</b> <sub>α</sub> <i>ade2-1 his3-1,15 leu2-3,112 trp1-1 ura3-1 cox6::URA3 trp1::COX6-HAC</i>  | ρ <sup>+</sup>                                | This study |
| W303ΔCOX9-HAC                | <b>MAT</b> <sub>α</sub> <i>ade2-1 his3-1,15 leu2-3,112 trp1-1 ura3-1 cox9::HIS3 trp1::COX9-HAC</i>  | ρ <sup>+</sup>                                | This study |
| W303ΔSHY1-CH                 | <b>MAT</b> <sub>α</sub> <i>ade2-1 his3-1,15 leu2-3,112 trp1-1 ura3-1 shy1::HIS3 leu2::SHY1-CH</i>   | ρ <sup>+</sup>                                | This study |
| W303ΔCOX14-CH                | <b>MAT</b> <sub>α</sub> <i>ade2-1 his3-1,15 leu2-3,112 trp1-1 ura3-1 cox14::trp1 URA3::COX14-CH</i> | ρ <sup>+</sup>                                | This study |
| W303ΔMSS51-CH                | <b>MAT</b> <sub>α</sub> <i>ade2-1 his3-1,15 leu2-3,112 trp1-1 ura3-1 mss51::HIS3 URA3::MSS51-CH</i> | ρ <sup>+</sup>                                | This study |
| W303ΔCOA1-HAC                | <b>MAT</b> <sub>α</sub> <i>ade2-1 his3-1,15 leu2-3,112 trp1-1 ura3-1 coa1::HIS3 URA3::COA1-HAC</i>  | ρ <sup>+</sup>                                | This study |
| W303ΔCOX5a/COX1-HAC          | <b>MAT</b> <sub>α</sub> <i>ade2-1 his3-1,15 leu2-3,112 trp1-1 ura3-1 cox5a::HIS3</i>                | ρ <sup>+</sup> ( <i>COX1-HAC</i> )            | This study |
| W303ΔPET494/COX1-HAC         | <b>MAT</b> <sub>α</sub> <i>ade2-1 his3-1,15 leu2-3,112 trp1-1 ura3-1 pet494::HIS3</i>               | ρ <sup>+</sup> ( <i>COX1-HAC</i> )            | This study |
| W303ΔPET111/COX1-HAC         | <b>MAT</b> <sub>α</sub> <i>ade2-1 his3-1,15 leu2-3,112 trp1-1 ura3-1 pet111::HIS3</i>               | ρ <sup>+</sup> ( <i>COX1-HAC</i> )            | This study |

|                              |                                                                                            |                                |            |
|------------------------------|--------------------------------------------------------------------------------------------|--------------------------------|------------|
| W303 $\Delta$ SHY1/COX1-HAC  | <b>MAT</b> $\alpha$ <i>ade2-1 his3-1,15 leu2-3,112 trp1-1 ura3-1 shy1::HIS3</i>            | $\rho^+$ (COX1-HAC)            | This study |
| aMRSI $\Delta$ CBP6/COX1-HAC | <b>MAT</b> $\alpha$ <i>ade2-1 his3-1,15 leu2-3,112 trp1-1 ura3-1 arg8::HIS3 cbp6::LEU2</i> | $\rho^+$ (introless, COX1-HAC) | This study |

<sup>A</sup> R. Rothstein, Department of Human Genetics and Development, Columbia University

Table S2 Primers used to construct different *cox1* alleles and genes expressing tagged proteins

| Primer name                                                          | Primer sequence (5' -> 3')                                                    |
|----------------------------------------------------------------------|-------------------------------------------------------------------------------|
| Primers for construction of the <i>cox1</i> null allele              |                                                                               |
| COX1-1                                                               | GTCGAGCTCAAGTAATATATAATATTTAAATAATAAG                                         |
| COX1-2                                                               | GTCGGATCCTTTTACTTTTTTTTTTATATATTAATTTAATAATATTATTATTATTATATTC                 |
| COX1-3                                                               | GTCGGATCCGTTATAAAATTTAATTATTTAC                                               |
| COX1-4                                                               | GTCTCTAGATACAATTAATTTAATCCGTTT                                                |
| Primers used to construct COX1-HA, COX1-HAH and COX1-HAC alleles     |                                                                               |
| COX1-11                                                              | GGCGGATCCTGCAGCTAATCTAATCTAAT                                                 |
| COX1-12                                                              | GGCGAATTCGGTACCAAGTAATATATAATATTTAAATAATAAG                                   |
| COX1-13                                                              | GGCGTGCACCTGGTTCACAATATTTAC                                                   |
| COX1-16                                                              | GGCGGTGACCCAATCTTATACGAGCATTTATTTTGATTCTTTGGACACCCTGAAGTA                     |
| COX1-HA                                                              | GGCGGATCCTTAAGCGTAGTCTGGGACGTCGTATGGGTAAGATTGTACAGCTGGTGTATT                  |
| COX1-H                                                               | GGCGGATCCTTAATGATGATGATGATGACCTCCAGCGTAGTCTGGGACGTCGTA                        |
| COX1-C                                                               | GGCGGATCCTTACTTACCATCGATTAACCGTGGATCTACCTGATCTTCACCTCCAGCGTAGTCTGGGACGTCGTA   |
| Primers used to construct nuclear gene products with HA and HAC tags |                                                                               |
| COA1-5'                                                              | AAGAGATCTTGGCCGTGCCCTTATCATCGT                                                |
| COA1-HA                                                              | GGCGTCGACTCAAGCGTAGTCTGGGACGTCGTATGGAATTGGTGTCTTGGTATTTTC                     |
| COA1-C                                                               | GGCGAGCTCTCATTTACCATCGATTAATCTTGGATCTACTTGATCTTCTCCTCCAGCGTAGTCTGGACGTCGTATGG |
| COX4-5'                                                              | GGCGAGCTCGCTTCTTCCAAGTATAAACAC                                                |
| COX4-HA                                                              | GGCGGATCCTCAAGCGTAGTCTGGGACGTCGTATGGGTAGTGATGGTGGTCATCATTTG                   |
| COX4-C                                                               | GGCGGATCCTCATTTACCATCGATTAATCTTGGATCTACTTGATCTTCTCCTCCAGCGTAGTCTGGACGTCGTATGG |
| COX5a-5'                                                             | GGCGAATTCCTACGCTTCTAAATAG                                                     |
| COX5a-HA                                                             | GGCGACCTCTCAAGCGTAGTCTGGGACGTCGTATGGGTATTTAGATTGGACCTGAGAATA                  |
| COX5a-C                                                              | GGCGAGCTCTCATTTACCATCGATTAATCTTGGATCTACTTGATCTTCTCCTCCAGCGTAGTCTGGACGTCGTATGG |
| COX6-5'                                                              | GGCGAGCTCCATACGAGCCAATCAG                                                     |
| COX6-HA                                                              | GGCGGTACCGTTCAAGCGTAGTCTGGGACGTCGTATGGGTAAGAAGAGCTTGGAAATAGCTC                |
| COX6-C                                                               | GGCCTGCAGTCATTTACCATCGATTAATCTTGGATCTACTTGATCTTCTCCTCCAGCGTAGTCTGGACGTCGTATGG |
| COX9-2                                                               | GGCCTGCAGTCAATGGTGATGGTGATGGTGGTTCTCTTGCTTTTTTCCTCTC                          |
| COX9-HA                                                              | GGCCTGCAGTCAAGCGTAGTCTGGGACGTCGTATGGGTAGTTCTCTTGCTTTTTTCCTCTC                 |
| COX9-C                                                               | GGCCTGCAGTCATTTACCATCGATTAATCTTGGATCTACTTGATCTTCTCCTCCAGCGTAGTCTGG            |

|          |                                                                                                                                |
|----------|--------------------------------------------------------------------------------------------------------------------------------|
|          | GGACGTCGTATGG                                                                                                                  |
|          | Primers used to construct nuclear gene products with CH tags                                                                   |
| COX14-5' | GGCGAGCTCGATTGGGGTGTCACGTAATGTAC                                                                                               |
| COX14-3' | GGCCTGCAGCTCGGTAGGAGGTGCAGTGGGACTTTG                                                                                           |
| MSS51-5' | GGCGAGCTCGGTTCTGTTAAAGTAGGACCCGC                                                                                               |
| MSS51-3' | GGCCTGCAGTTGTCTCTTGATTGTATGGTACC                                                                                               |
| SHY1-5'  | GGCGAGCTCCCCAAAGGATATACAGCCGAGCAGG                                                                                             |
| SHY1-3'  | GGCCTGCAGCATATATTTTCCTTGAATGCTTCAG                                                                                             |
|          | Complementary oligonucleotides used to construct YIp351-CH and YIp352-CH                                                       |
|          | GGAAGATCAGGTAGATCCACGGTTAATCGATGGTAAGGGAGGAGACACCATCACCATCA<br>ACGTCCTTCTAGTCCATCTAGGTGCCAATTAGCTACCATTCCTCCTCCTGTGGTAGTGGTAGT |
|          | TCACTAAA<br>AGTGATTTTCGA                                                                                                       |

The primers used to add the sequences for the HA, poly histidine, and protein C tags terminate with HA, H, and C, respectively. The upstream and downstream primers used to amplify the genes for cloning into YIp351-CH and YIp352-CH terminate with the suffixes 5' and 3', respectively.

Fig. S1

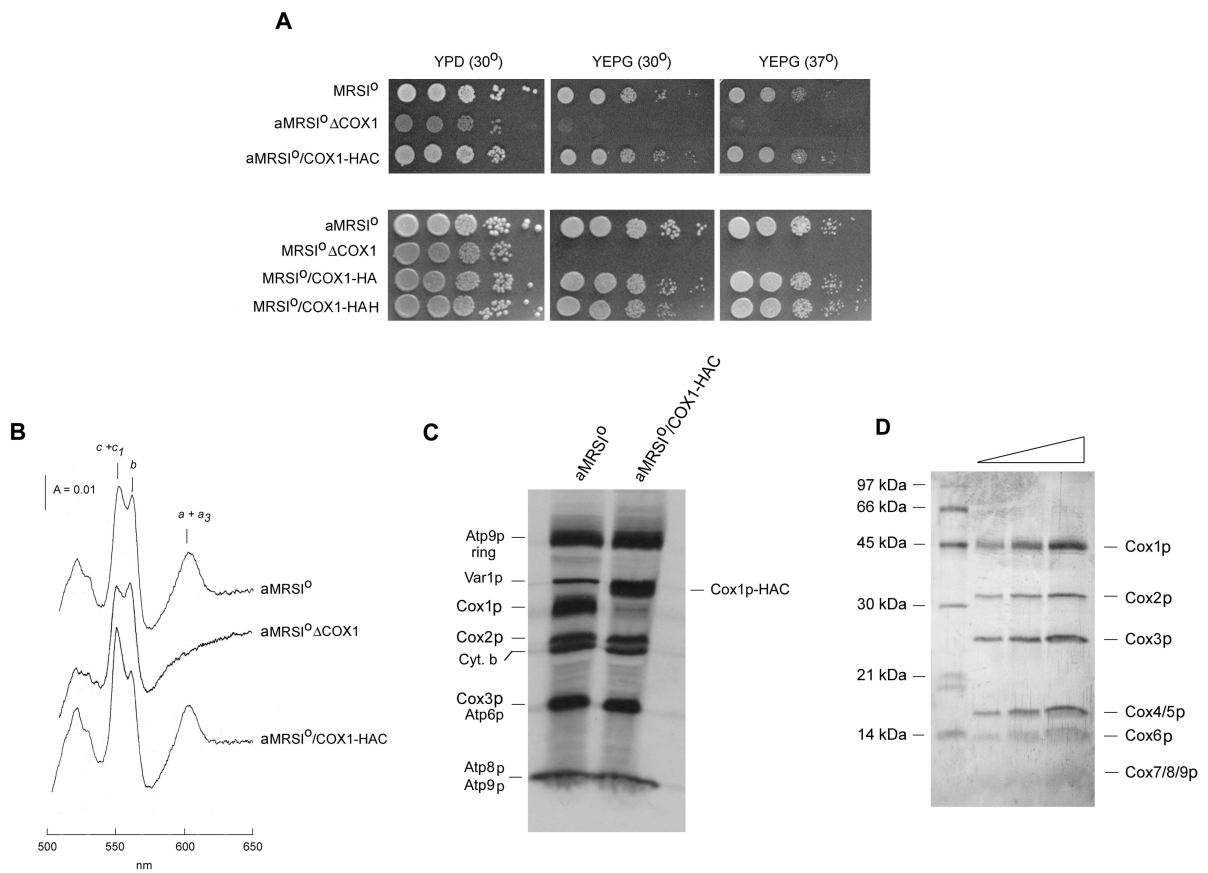

Fig. S2

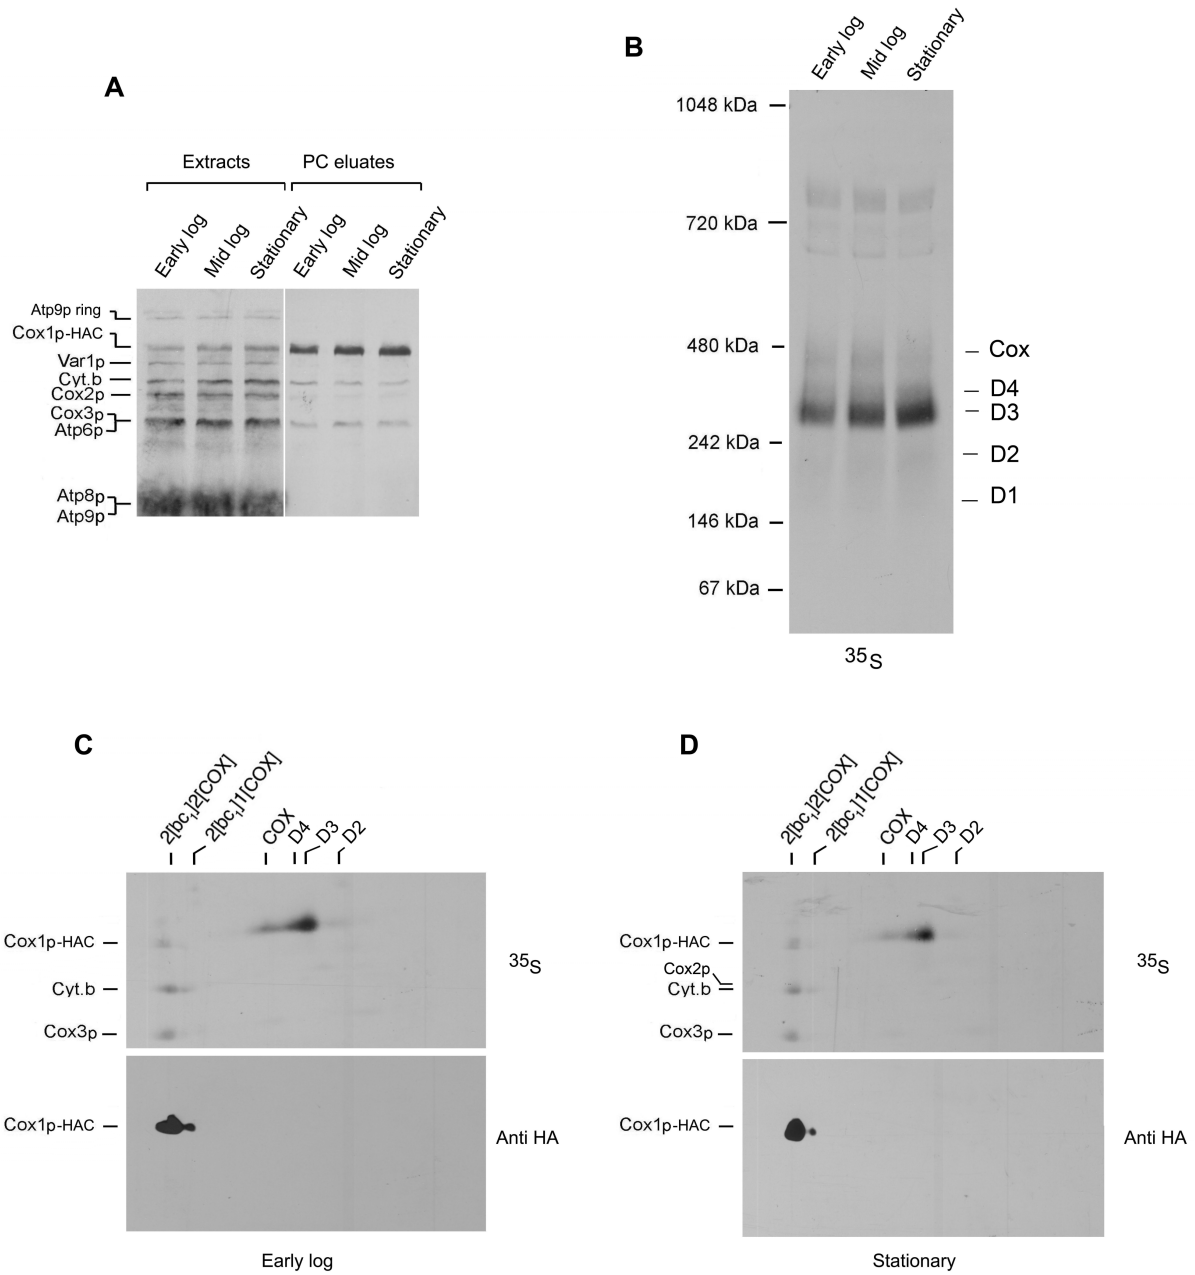

Fig. S3

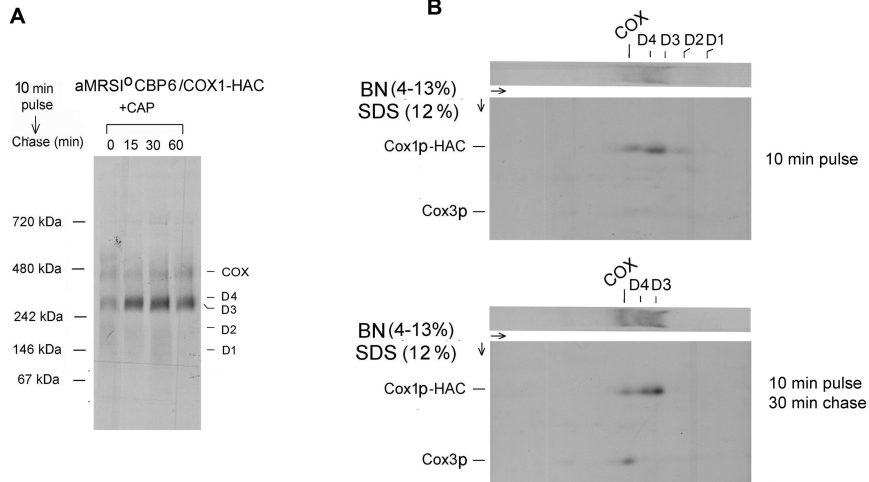

Fig. S4

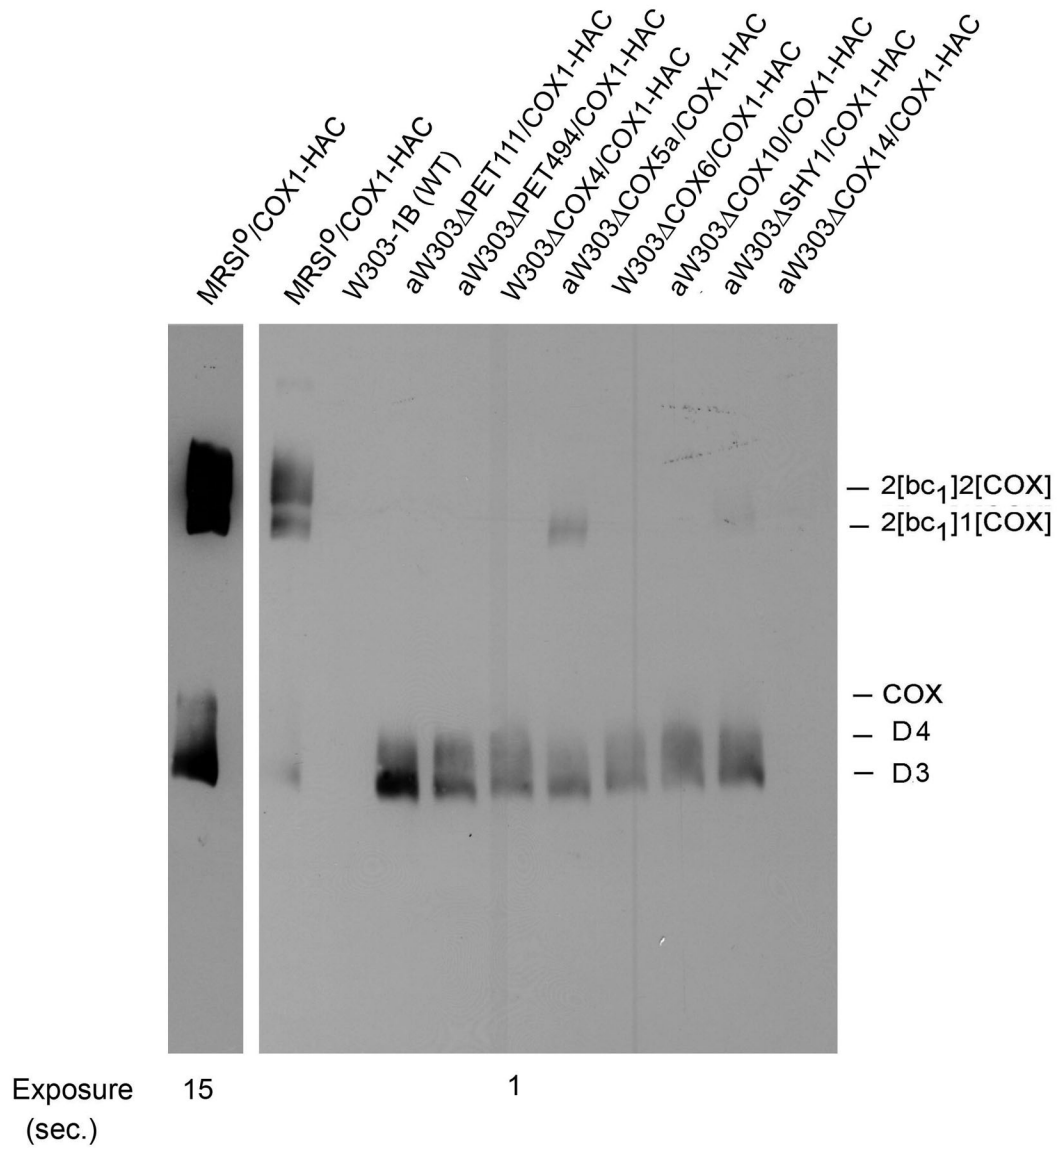



Fig. S5

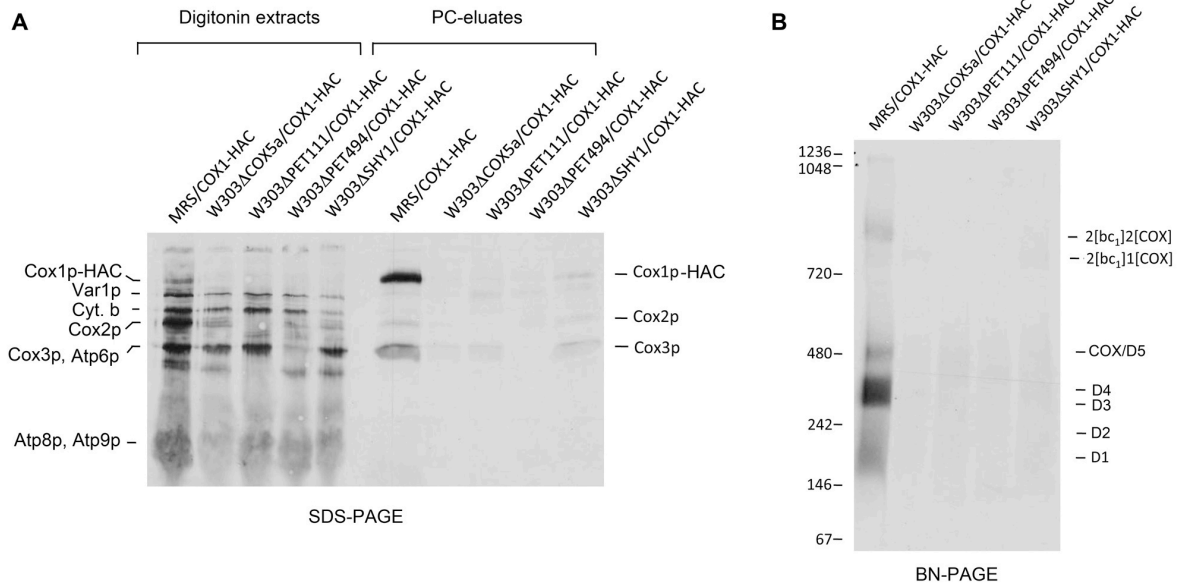

## References

- Barros MH, Myers AM, Van Driesche S, Tzagoloff A (2006) *COX24* codes for a mitochondrial protein required for processing of the *COX1* transcript. *J Biol Chem* 281: 3743-3751.
- Rak M, Tetaud E, Godard F, Sagot I, Salin B, Duvezin-Caubet S, Slonimski PP, Rytka J, di Rago JP (2007) Yeast cells lacking the mitochondrial gene encoding the ATP synthase subunit 6 exhibit a selective loss of complex IV and unusual mitochondrial morphology. *J Biol Chem* 282: 10853-10864.
- Steele DF, Butler CA, Fox TD (1996) Expression of a recoded nuclear gene inserted into yeast mitochondrial DNA is limited by mRNA-specific translational activation. *Proc Natl Acad Sci USA* 93: 5253-5257.
- Tzagoloff A, Akai A, Needleman RB, Zulch G (1975) Assembly of the mitochondrial membrane system. Cytoplasmic mutants of *Saccharomyces cerevisiae* with lesions in enzymes of the respiratory chain and in the mitochondrial ATPase. *J Biol Chem* 250: 8236-8242.

## Legends to Figures

FIGURE S1. Properties of yeast expressing Cox1p with different C-terminal tags. **(A)** The parental strains aMRSI<sup>o</sup> and MRS-3A, the *cox1* null mutants aMRSI<sup>o</sup>ΔCOX1 and aMRSI<sup>o</sup>ΔCOX1, and aMRS/COX1-HA, aMRSI<sup>o</sup>/COX1-HAC and aMRS/COX1-HAH expressing Cox1p with, respectively, the single HA and the double HA plus protein C and HA plus poly histidine tags, were grown in liquid YPD and serial dilutions were spotted on solid YEPG and incubated at 30°C and 37°C for 2 days. The red color resulting from the *ade2* marker in some strains makes them appear to grow less in YPD. **(B)** Cytochromes were extracted from mitochondria of the same strains at a protein concentration of 5 mg/ml and difference spectra of reduced (dithionite) versus oxidized (ferricyanide) were recorded at room temperature (Tzagoloff *et al*, 1975). The  $\alpha$  bands of cytochrome *a*, *a*<sub>3</sub>, *b*, *c*, and *c*<sub>1</sub> are indicated. **(C)** Mitochondria prepared from the respiratory competent haploid strain MRSI<sup>o</sup> and MRSI<sup>o</sup>/COX1-HAC were labeled with <sup>35</sup>S-methionine plus cysteine. The mitochondria were dissolved in Laemmli sample buffer (Laemmli, 1970) and separated by SDS-PAGE on a 12% polyacrylamide gel. The radiolabeled mitochondrial gene products identified in the margins are the three subunits of cytochrome oxidase (Cox1p or Cox1p-HAC, Cox2p, Cox3p), mitochondrial ribosomal protein (Var1p), cytochrome *b* (Cyt. *b*), and three subunits of the ATP synthase (Atp6p, Atp8p, Atp9p). The HA and protein C double tag in Cox1p-HAC retards its migration. **(D)** Purification of COX from aMRSI<sup>o</sup>/COX1-HAC. Mitochondria at a protein concentration of 10 mg/ml in 0.6M sorbitol, 20 mM Hepes, pH 7 were extracted with 1.6 volumes of 10% lauryl maltoside. The soluble fraction (160  $\mu$ l) obtained after centrifugation at 100,000 x *g*<sub>av</sub> for 10 min was diluted with 100  $\mu$ l of binding buffer (20 mM Tris-Cl, pH 7.5, 2 mM CaCl<sub>2</sub> and 100 mM NaCl) and added to 100  $\mu$ l of packed agarose beads coupled to an antibody against the protein C epitope (Roche Diagnostics, Mannheim) prewashed with binding buffer. The mixture was rotated at 4°C for 90 min and centrifuged 1,000 x *g*<sub>av</sub> for 1 min. Unbound proteins were removed and the beads

were washed 3 times with 1 ml of binding buffer containing 0.2% lauryl maltoside. COX was eluted from the beads with 80  $\mu$ l of elution buffer (10 mM Tris-Cl, pH 7.5, 50 mM NaCl, 0.5% lauryl maltoside, 7 mM EDTA). After rotation of the beads at 4°C for 30 min, they were centrifuged and 5, 10 and 20  $\mu$ l of the supernatant was separated by SDS-PAGE on a 17% polyacrylamide gel. Proteins were detected by staining with silver. Protein standards were loaded in the left lane.

FIGURE S2. Labeling of Cox1p intermediates in mitochondria from cells harvested at different stages of growth. aMRSI<sup>0</sup>/COX1-HAC cells grown in YPGal were harvested in early log, mid log and early stationary phase. Mitochondria were labeled at 24°C for 20 min with <sup>35</sup>S methionine plus cysteine. Puromycin was added and after an additional 30 min incubation they were extracted with digitonin and purified on protein C antibody beads as described in the legend to Fig. 2. **(A)** Samples of the digitonin extracts and antibody eluates were separated by SDS-PAGE on a 17% polyacrylamide gel. **(B)** The antibody eluates were separated by BN-PAGE on a 4-13% polyacrylamide gel. **(C and D)** The antibody eluates obtained from early log and early stationary phase were separated in the first dimension by BN-PAGE and in the second dimension by SDS-PAGE on a 12% polyacrylamide gel. The radiolabeled bands are identified in the margins.

FIGURE S3 Pulse-chase analysis of Cox1p intermediates in a *cbp6* null mutant. **(A)** Mitochondria from aMRSI<sup>0</sup> $\Delta$ CBP6/COX1-HAC harboring the *COX1-HAC* allele were pulsed for 10 min with <sup>35</sup>S-methionine plus cysteine at 24°C. Following addition of puromycin incubation was continued for the indicated times. Equal volume samples were extracted with digitonin, purified on protein C antibody beads as described in Fig. 1 and separated by BN-PAGE on a 4-13% polyacrylamide gel. **(B)** Antibody eluates of the 0 time (pulse) and 30 min pulsed sample were separated in the first dimension by BN-PAGE and in the second dimension by SDS-PAGE on a 12% polyacrylamide gel. The positions of COX and different Cox1p intermediates are marked in the margins.

FIGURE S4. The D3 and D4 intermediates are immunochemically detectable under steady-state conditions in respiratory competent and a panel of COX mutants. Mitochondria from MRSI<sup>0</sup>/COX1-HAC, W303-1B, aW303 $\Delta$ PET111/COX1-HAC, aW303 $\Delta$ PET494/COX1-HAC, aW303 $\Delta$ COX4/COX1-HAC, aW303 $\Delta$ COX5a/COX1-HAC, W303 $\Delta$ COX6/COX1-HAC, aW303 $\Delta$ COX10/COX1-HAC, aW303 $\Delta$ SHY1/COX1-HAC and aW303 $\Delta$ COX14/COX1-HAC were solubilized at 10 mg/ml with 3% digitonin (3mg digitonin/1mg mitochondrial protein) in extraction buffer. The extracts (450  $\mu$ g) were incubated with protein C antibody beads as described in the legend to Fig. 2. The eluates (equivalent to 100  $\mu$ g starting material) were separated by 4-13% BN-PAGE, transferred to a PVDF membrane and probed with anti-HA antibody.

FIGURE S5. *In organello* translation of Cox1-HAC in a panel of cytochrome oxidase mutants. Mitochondria were prepared from the respiratory competent strain MRS/COX1-HAC and from the COX deficient strains W303 $\Delta$ COX5a/COX1-HA, W303 $\Delta$ PET494/COX1-HAC, W303 $\Delta$ PET111/COX1-HAC and W303 $\Delta$ SHY1/COX1-HAC. The mitochondria were labeled for 30 min with <sup>35</sup>S-methionine plus cysteine and were extracted with 3% digitonin. The digitonin extracts were purified on protein C antibody beads as described in detailed in the legend to Fig. 2. Samples of the extracts (Digitonin extracts) and eluates from the beads (PC-eluates) were

separated by SDS-PAGE on a 17% polyacrylamide gel. The eluates were also separated on a 4-13% gel by BN-PAGE. Radiolabeled proteins were visualized by exposure to X-ray film following transfer to nitrocellulose or PVDF membranes.
